# Supplementary material for: A novel hybrid machine learning approach for suspended sediment load forecasting: A case study of Mazandaran rivers basins
Source: Research Square preprint supplement (doi:10.21203/rs.3.rs-7607699/v1), 2025-10-07
Supplement: Supplementary file 1 [file 128ad422f92eddc4823e280c.docx]

**Article Title:** A Novel Hybrid Machine Learning Approach for Suspended Sediment Load Forecasting in Environmental Systems: A Case Study of Mazandaran River Basins

**Journal Name:** Modeling Earth Systems and Environment

**Author Names:** Ali Akbar Eatesam, Khosrow Hosseini, Hojat Karami

**Corresponding Author:** Khosrow Hosseini

Department of Civil Engineering, Semnan University, 5th Km of Damghan Road, Semnan, Iran. Postal Code: 35131-19111.

Email: khhoseini@semnan.ac.ir

This document provides supplementary tables containing the full performance results for all input scenarios (M₁, M₂, and M₃) evaluated in the study.

**Table S1:** Full performance comparison of hybrid SVR models across all input data combinations.

| Model |  |  | Train |  |  |  |  |  | Test |  |  |
| --- | --- | --- | --- | --- | --- | --- | --- | --- | --- | --- | --- |
|  | RMSE | MAE | R | KGE | NSE |  | RMSE | MAE | R | KGE | NSE |
| SVR (M1) | 10.32 | 6.46 | 0.61 | 0.35 | 0.21 |  | 10.86 | 6.76 | 0.62 | 0.29 | 0.20 |
| SVR-PSO (M1) | 3.54 | 2.61 | 0.90 | 0.85 | 0.80 |  | 4.14 | 2.77 | 0.86 | 0.81 | 0.75 |
| SVR-FDA (M1) | 3.65 | 2.68 | 0.89 | 0.83 | 0.79 |  | 3.56 | 2.56 | 0.90 | 0.70 | 0.81 |
| SVR (M2) | 17.27 | 9.42 | 0.23 | 0.00 | 0.01 |  | 15.47 | 8.80 | 0.31 | 0.10 | 0.01 |
| SVR-PSO (M2) | 12.68 | 6.53 | 0.43 | 0.20 | 0.18 |  | 13.51 | 6.95 | 0.45 | 0.20 | 0.20 |
| SVR-FDA (M2) | 12.67 | 6.53 | 0.44 | 0.19 | 0.19 |  | 13.97 | 6.98 | 0.41 | 0.21 | 0.17 |
| SVR (M3) | 11.65 | 6.86 | 0.63 | 0.22 | 0.25 |  | 11.38 | 6.98 | 0.63 | 0.21 | 0.24 |
| SVR-PSO (M3) | 3.44 | 2.47 | 0.90 | 0.83 | 0.81 |  | 3.75 | 2.55 | 0.87 | 0.83 | 0.76 |
| SVR-FDA (M3) | 3.37 | 2.39 | 0.90 | 0.86 | 0.81 |  | 3.42 | 2.40 | 0.91 | 0.73 | 0.82 |

**Table S2:** Full performance comparison of hybrid LSTM models across all input data combinations.

| Model |  |  | Train |  |  |  |  |  | Test |  |  |
| --- | --- | --- | --- | --- | --- | --- | --- | --- | --- | --- | --- |
|  | RMSE | MAE | R | KGE | NSE |  | RMSE | MAE | R | KGE | NSE |
| LSTM (M1) | 18.23 | 10.30 | 0.63 | 0.39 | 0.05 |  | 17.79 | 10.36 | 0.61 | 0.21 | 0.05 |
| LSTM-PSO (M1) | 5.24 | 3.37 | 0.81 | 0.67 | 0.65 |  | 5.19 | 3.26 | 0.83 | 0.70 | 0.68 |
| LSTM-FDA (M1) | 4.76 | 3.15 | 0.84 | 0.75 | 0.70 |  | 4.66 | 3.15 | 0.84 | 0.76 | 0.70 |
| LSTM (M2) | 49.20 | 22.74 | 0.39 | 0.28 | 0.02 |  | 41.33 | 21.89 | 0.42 | 0.42 | 0.01 |
| LSTM-PSO (M2) | 12.97 | 6.85 | 0.45 | 0.21 | 0.20 |  | 11.32 | 5.93 | 0.41 | 0.20 | 0.16 |
| LSTM FDA (M2) | 12.81 | 6.75 | 0.44 | 0.16 | 0.19 |  | 12.66 | 6.56 | 0.46 | 0.18 | 0.21 |
| LSTM (M3) | 9.87 | 5.74 | 0.63 | 0.46 | 0.35 |  | 9.61 | 5.43 | 0.65 | 0.60 | 0.37 |
| LSTM-PSO (M3) | 4.95 | 3.25 | 0.85 | 0.75 | 0.72 |  | 4.50 | 3.02 | 0.86 | 0.70 | 0.65 |
| LSTM-FDA (M3) | 4.45 | 3.05 | 0.85 | 0.75 | 0.72 |  | 4.15 | 3.00 | 0.86 | 0.73 | 0.73 |

**Table S3:** Full performance comparison of hybrid RF models across all input data combinations.

| Model |  |  | Train |  |  |  |  |  | Test |  |  |
| --- | --- | --- | --- | --- | --- | --- | --- | --- | --- | --- | --- |
|  | RMSE | MAE | R | KGE | NSE |  | RMSE | MAE | R | KGE | NSE |
| RF (M1) | 7.76 | 4.77 | 0.69 | 0.54 | 0.48 |  | 7.75 | 4.83 | 0.69 | -0.41 | 0.47 |
| RF-PSO (M1) | 2.60 | 2.04 | 0.94 | 0.87 | 0.89 |  | 3.70 | 2.67 | 0.88 | 0.72 | 0.77 |
| RF-FDA (M1) | 2.73 | 2.11 | 0.94 | 0.85 | 0.87 |  | 3.66 | 2.64 | 0.89 | 0.85 | 0.79 |
| RF (M2) | 12.97 | 6.69 | 0.41 | 0.15 | 0.16 |  | 16.42 | 7.99 | 0.42 | 0.17 | 0.17 |
| RF-PSO (M2) | 13.29 | 6.89 | 0.43 | 0.19 | 0.19 |  | 9.71 | 5.77 | 0.50 | 0.26 | 0.25 |
| RF-FDA (M2) | 12.20 | 6.48 | 0.45 | 0.27 | 0.21 |  | 14.87 | 7.63 | 0.39 | 0.16 | 0.15 |
| RF (M3) | 7.70 | 4.47 | 0.70 | 0.46 | 0.48 |  | 7.39 | 4.36 | 0.70 | 0.41 | 0.48 |
| RF-PSO (M3) | 2.65 | 2.11 | 0.94 | 0.87 | 0.88 |  | 3.52 | 2.45 | 0.89 | 0.86 | 0.79 |
| RF-FDA (M3) | 2.45 | 1.98 | 0.95 | 0.87 | 0.90 |  | 3.26 | 2.44 | 0.92 | 0.88 | 0.84 |
